# Supplementary material for: Ethanol conversion into butadiene over Zr-containing molecular sieves doped with silver
Source: Royal Society of Chemistry journal article supplement (doi:10.1039/c4gc02202e), 2015-01-01
Supplement: c4gc02202e1.pdf [file c4gc02202e1.pdf]

## Ethanol Conversion into Butadiene over Zr-containing Molecular Sieves doped with Silver

Vitaly L. Sushkevich, Irina I. Ivanova and Esben Taarning

### Supporting information

#### Experimental Section

TG experiments over used catalysts were performed on “TA SDT Q600” instrument. Temperature programmed oxidation was carried out in a flow of air (100ml/min) in the temperature range of 293-1073 K with the rate of heating of 10 K/min.

#### Catalyst characterisation

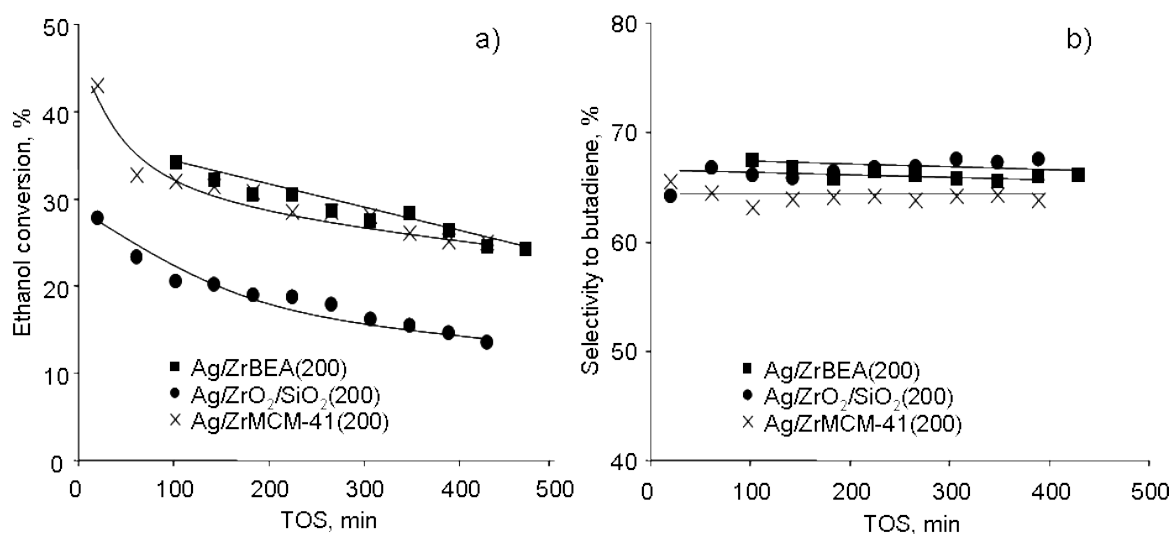

Figure S1. Conversion of ethanol (a) and selectivity towards butadiene (b) for Ag/ZrBEA(200), Ag/ZrMCM-41(200) and Ag/ZrO<sub>2</sub>/SiO<sub>2</sub>(200) versus time on stream (T = 593K, WHSV = 0.32 g/g·h).

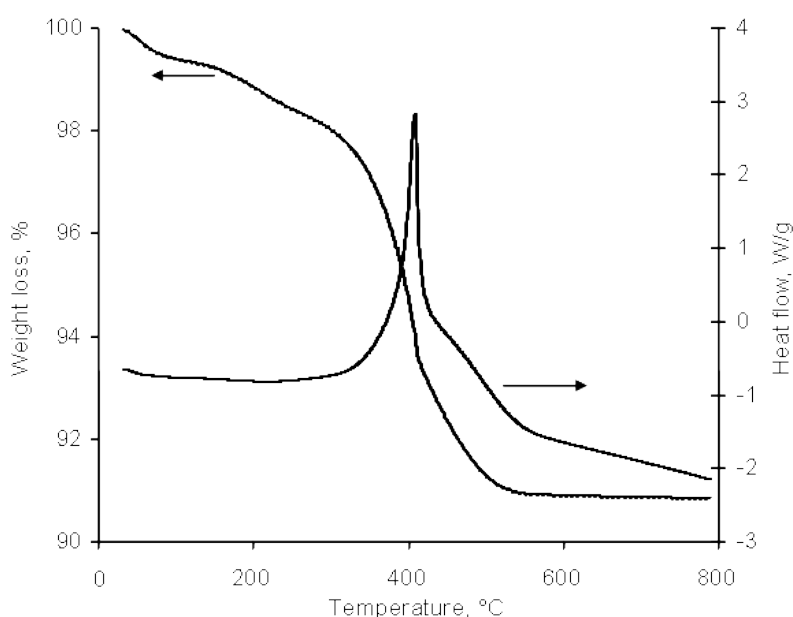

Figure S2. TG-DTA curves for deactivated Ag/ZrBEA(100) catalyst
